# Supplementary material for: Engineering DNAzyme cascade for signal transduction and amplification
Source: Royal Society of Chemistry journal article supplement (doi:10.1039/c9an02003a), 2020-01-01
Supplement: c9an02003a1.pdf [file c9an02003a1.pdf]

## Electronic Supplementary Information (ESI)

### Engineering DNazymes Cascade for Signal Transduction and Amplification

Jing Li<sup>1,#</sup>, Ke Quan<sup>2,#</sup>, Yanjing Yang<sup>3</sup>, Xiaohai Yang<sup>1</sup>, Xiangxian Meng<sup>1</sup>,

Jin Huang<sup>1,\*</sup> and Kemin Wang<sup>1,\*</sup>

<sup>1</sup>State Key Laboratory of Chemo/Biosensing and Chemometrics, College of Chemistry and Chemical Engineering, Key Laboratory for Bio-Nanotechnology and Molecular Engineering of Hunan Province, Hunan University, Changsha, P. R. China.

<sup>2</sup>School of Chemistry and Food Engineering, Changsha University of Science and Technology, Changsha, P. R. China.

<sup>3</sup>College of Chemistry and Chemical Engineering, Central South University, Changsha, P. R. China.

<sup>#</sup>These authors contributed equally to this work.

\*Email: [jinhuang@hnu.edu.cn](mailto:jinhuang@hnu.edu.cn); [kmwang@hnu.edu.cn](mailto:kmwang@hnu.edu.cn)

**Table S1. All oligonucleotides sequences were used in experiment (from 5' to 3').**

|                     |                                                                   |
|---------------------|-------------------------------------------------------------------|
| <b>Bare Dz1:</b>    | CATCTCTTCTCCGAGCCGGTCGAAATACTGTCA                                 |
| <b>S1:</b>          | CCACCACTGACAGTAT/rA/GGAAGAGATGTGGTGGTCCGAGCC<br>GGTCGAAATAGTG     |
| <b>Bare Dz2:</b>    | GTGGTGGTCCGAGCCGGTCGAAATAGTG                                      |
| <b>S2:</b>          | FAM-CACTAT/rA/GCCACCAC-BHQ1                                       |
| <b>L-S1:</b>        | FAM-<br>CCACCACTGACAGTATrAGGAAGAGATGTGGdT <sup>+</sup> BHQ1GGTCCG |
| <b>W1</b>           | AGCCGGTCGAAATAGTG<br>CCACCACTGACAGTATA                            |
| <b>Dz1:</b>         | TTGTATAGTTCATCTCTTCTCCGAGCCGGTCGAAATACTGTCA                       |
| <b>Inhibitor1:</b>  | GAAGAGATGTAACCTATAACAACCTACTA                                     |
| <b>Trigger1:</b>    | TAGTAGGTTGTATAGTTACATC                                            |
| <b>Dz2:</b>         | TTGGAAGAGATGTGGTGGTCCGAGCCGGTCGAAATAGTG                           |
| <b>Inhibitor2:</b>  | CCACCACATCTCTTCCAACCTACTAC                                        |
| <b>Trigger2:</b>    | GTAGTAGGTTGGAAGAGATGTGG                                           |
| <b>Cleaved S2:</b>  | FAM-CACTATA                                                       |
| <b>W2*:</b>         | GCCACCACTTTTTTTTTTTTTTTT                                          |
| <b>Let-7a:</b>      | TGAGGTAGTAGGTTGTATAGTT                                            |
| <b>Dz2*:</b>        | TTGTATAGTGTGGTGGTCCGAGCCGGTCGAAATAGTG                             |
| <b>Inhibitor2*:</b> | CACCACAACCTATAACAACCTACTACC                                       |
| <b>Dz1*</b>         | GTATAGTTACATCTCTTCTCCGAGCCGGTCGAAATACTGTCAG                       |

**Inhibitor1\*:** AAGAGATGTAACCTATAACAACCTACTACCTCA

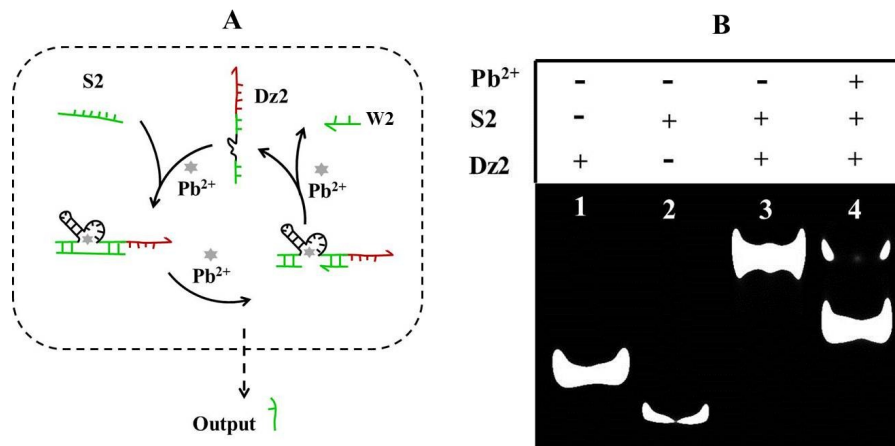

**Fig. S1 Verification the cleavage feasibility of Dz2.** (A) Schematic illustration of Dz2 cleavage. (B) 12% PAGE verified the feasibility of Dz2 cleavage. (+ denotes with it, -denotes without it).

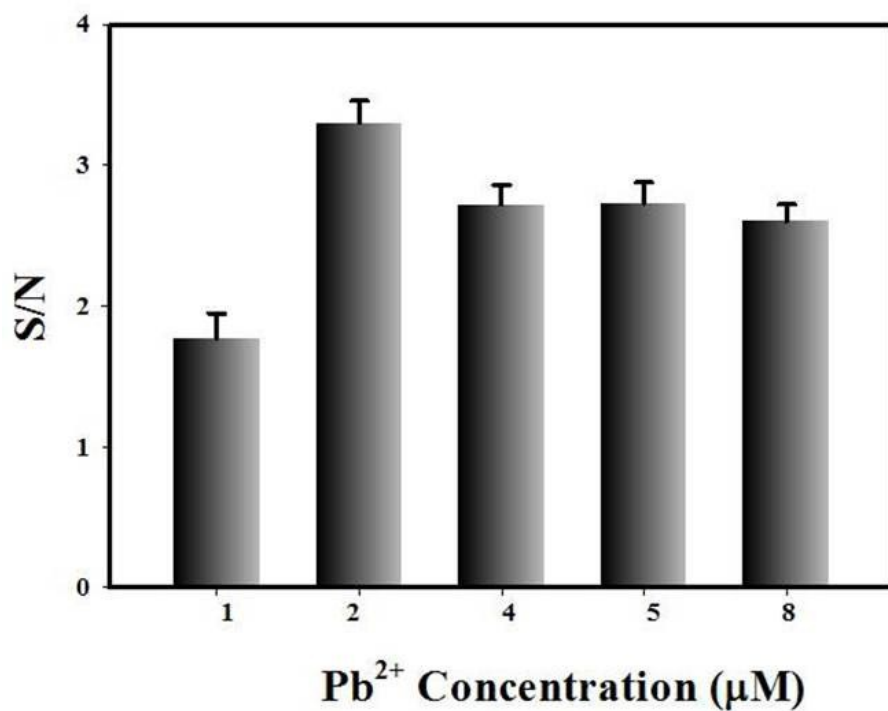

**Fig. S2 Optimizing the concentration of Pb<sup>2+</sup>.** (A) The signal-to-noise ratio changed as a function of various Pb<sup>2+</sup> concentrations (1 μM, 2 μM, 4 μM, 5 μM, 8 μM). The error bar represents the standard deviation of three independent experiments.

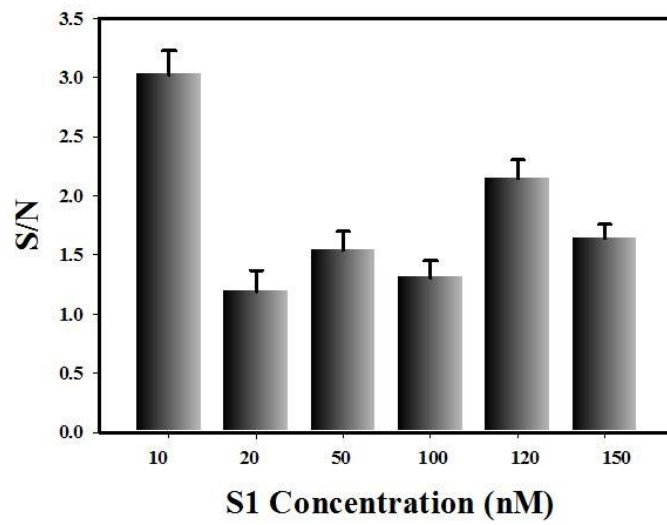

**Fig. S3 Investigation of the concentration of S1.** IDz1 and S2 were 100 nM in 50 mM tris-HCl for 3 h at 25°C. Error bars are standard deviation obtained from three independent experiments.

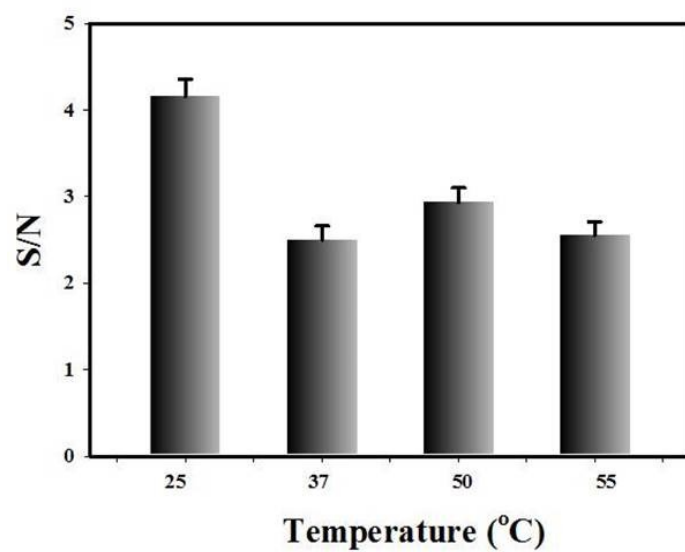

**Fig. S4 Study the effect of temperature on reaction system.** The different temperature points (25°C, 37°C, 50°C, 55°C) were tested to obtain the optimum reaction temperature. The error bar represents the standard deviation of three independent experiments.

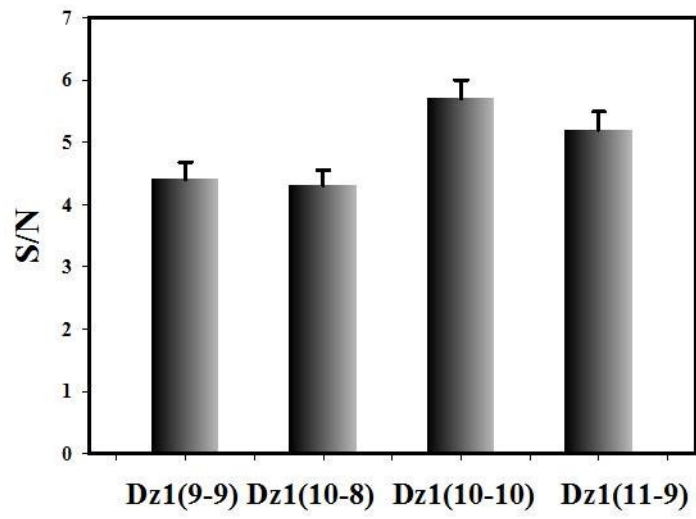

**Fig. S5** Assays the binding arm length of Dz1. S2 were 100 nM in 50 mM tris-HCl for 3 h at 25°C. The error bar represents the standard deviation of three independent experiments.

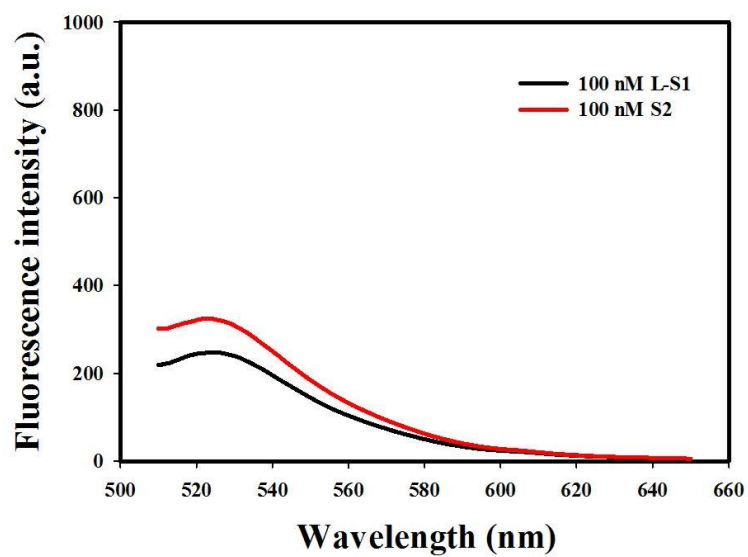

**Fig. S6 Fluorescence intensity assays of the L-S1 and S2.** 100 nM L-S1 and 100 nM S2 were dispersed in 50 mM tris-HCl and corresponding fluorescence intensity was measured on F-7000 at 25°C, respectively.



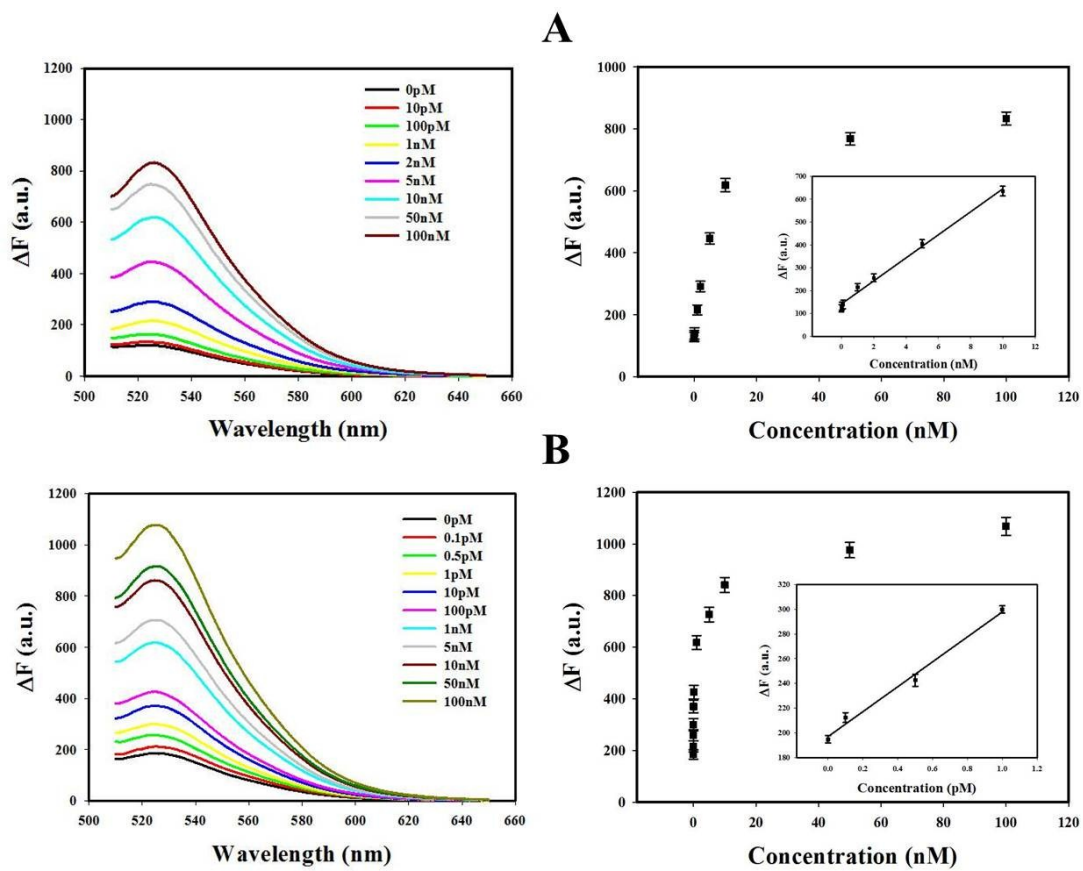

**Fig. S7 Amplification efficiency of one step DNAzyme reaction (A) and multiple DNAzymes cascade (B).** The fluorescence intensity changed as a function of trigger DNA concentrations and corresponding standard curve. The fluorescence experiments were performed on F-7000 exciting at 488 nm and recording emission from 520 nm to 650 nm. The error bar represents the standard deviation of three independent experiments.

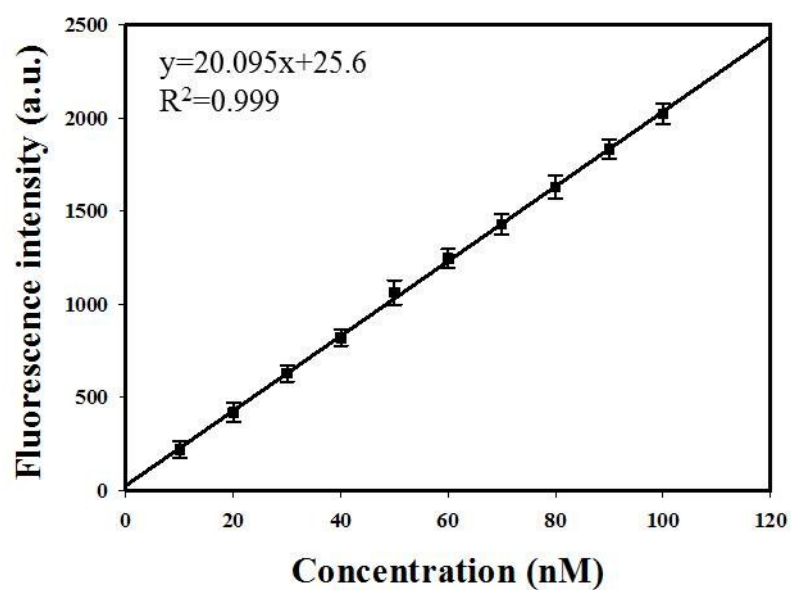

**Fig. S8 Standard plot of cleaved S2 labeled with FAM.** A standard curve of fluorescence intensity as a function of various given concentrations of cleaved products of S2 labeled with FAM. The error bar represents the standard deviation of three independent experiments.

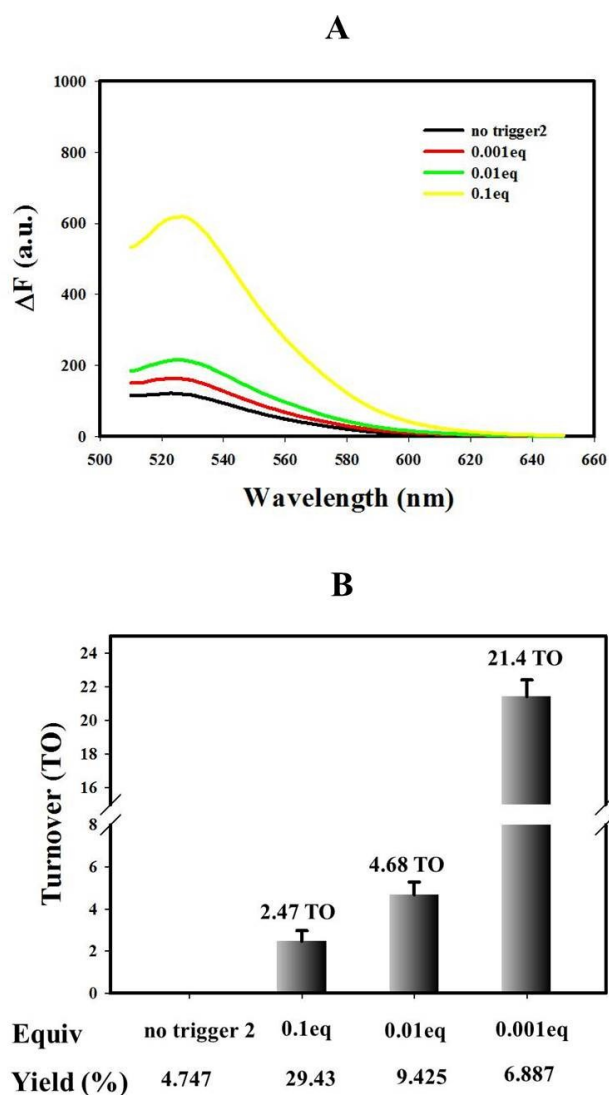

**Fig. S9 Turnover experiment of one step DNAzyme reaction.** (A) The fluorescence intensity changed with various trigger DNA concentrations (from 10 nM to 10 pM) and probe concentrations were 100 nM. Equiv = trigger DNA concentration/probe concentration (0.1eq, 0.01eq, 0.001eq). It was used for obtaining the concentration of fluorescent products by corresponding standard curve. (B) The histogram denotes the calculated turnover number of one step DNAzyme reaction with corresponding equiv and yields according to the formula of turnover number. The error bar represents the standard deviation of three independent experiments.

**Table S2. Analytical recoveries of one step DNzyme reaction in detecting let-7a  
in human serum samples**

| Sample | Added (nM) | Found (nM) | Recovery (%) | RSD (%), n=3 |
|--------|------------|------------|--------------|--------------|
| 1      | 0.1        | 0.0996     | 99.6         | 1.35         |
| 2      | 2          | 2.083      | 104.2        | 2.37         |
| 3      | 5          | 4.912      | 98.2         | 0.62         |

Recovery= (Found/Added) × 100%
